# Supplementary material for: Metastasis-associated macrophages constrain antitumor capability of natural killer cells in the metastatic site at least partially by membrane bound transforming growth factor β
Source: HighWire-hosted journal article supplement (doi:10.1136/jitc-2020-001740), 2021-01-01
Supplement: jitc-2020-001740supp002_data_supplement.pdf [file jitc-2020-001740supp002_data_supplement.pdf]

## Supplemental material

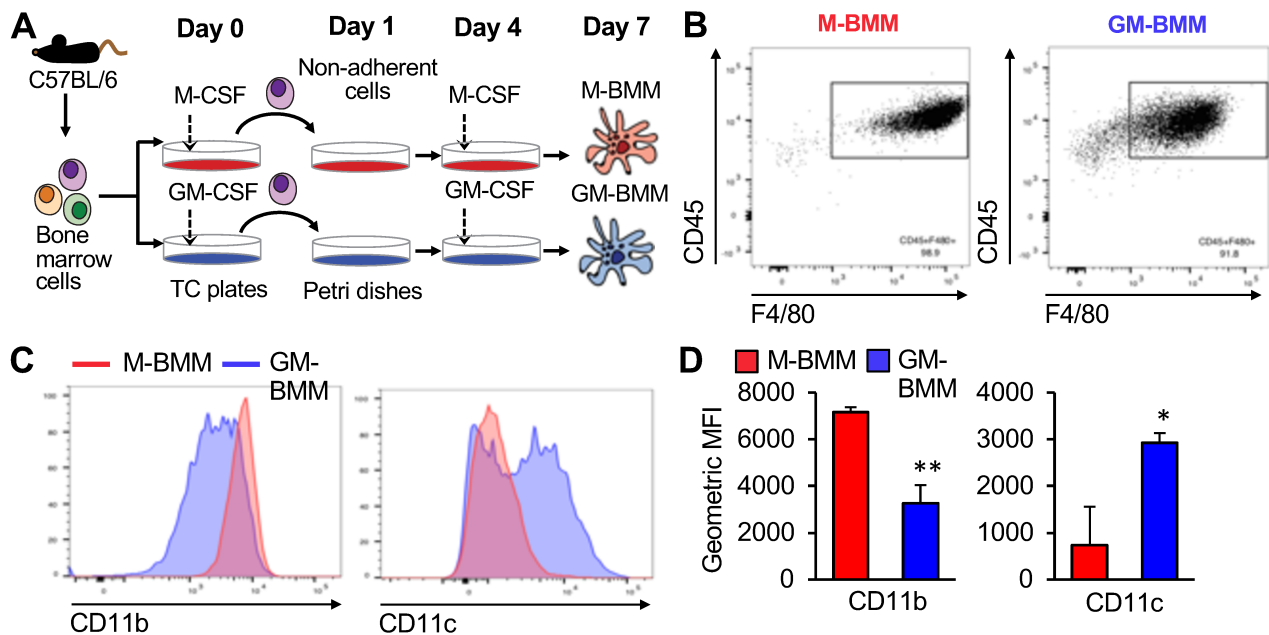

**Supplementary Figure 2. Preparation of bone marrow-derived macrophages (BMMs) with different phenotypes.** (A) A protocol to prepare two different BMM populations. Bone marrow cells collected from the femur and tibia of C57BL/6 mice were cultured in tissue culture plates with alpha MEM including 10% FBS, 100U/mL penicillin and 100ug/mL streptomycin, and recombinant murine 1000U/mL M-CSF or 25ng/mL GM-CSF (Peprotech). After 24 hours, non-adherent cells were transferred to Petri dishes and cultured for 3 days. On day 4, adherent cells were given fresh media including either 1000U/mL M-CSF or 25ng/mL GM-CSF. On day 7, adherent cells were harvested as mature macrophages. BMMs cultured with M-CSF or GMCSF were termed M-BMMs or GM-BMMs respectively. (B) Representative dot plots from four experiments showing expression of CD45 and F4/80 on M-BMMs and GM-BMMs. (C) Representative histograms from four experiments showing expression of CD11b and CD11c on M-BMMs or GM-BMMs within the CD45<sup>+</sup>F4/80<sup>+</sup> gate. (D) Geometric mean fluorescence intensities of CD11b and CD11c on M-BMMs and GM-BMMs ( $n = 4$  in each cell type from four experiments). All data show mean  $\pm$  SEM. \*,  $P < 0.05$ ; \*\*,  $P < 0.01$  (Student's  $t$  test).
