# Supplementary material for: Metastasis-associated macrophages constrain antitumor capability of natural killer cells in the metastatic site at least partially by membrane bound transforming growth factor β
Source: HighWire-hosted journal article supplement (doi:10.1136/jitc-2020-001740), 2021-01-01
Supplement: jitc-2020-001740supp003_data_supplement.pdf [file jitc-2020-001740supp003_data_supplement.pdf]

## Supplemental material

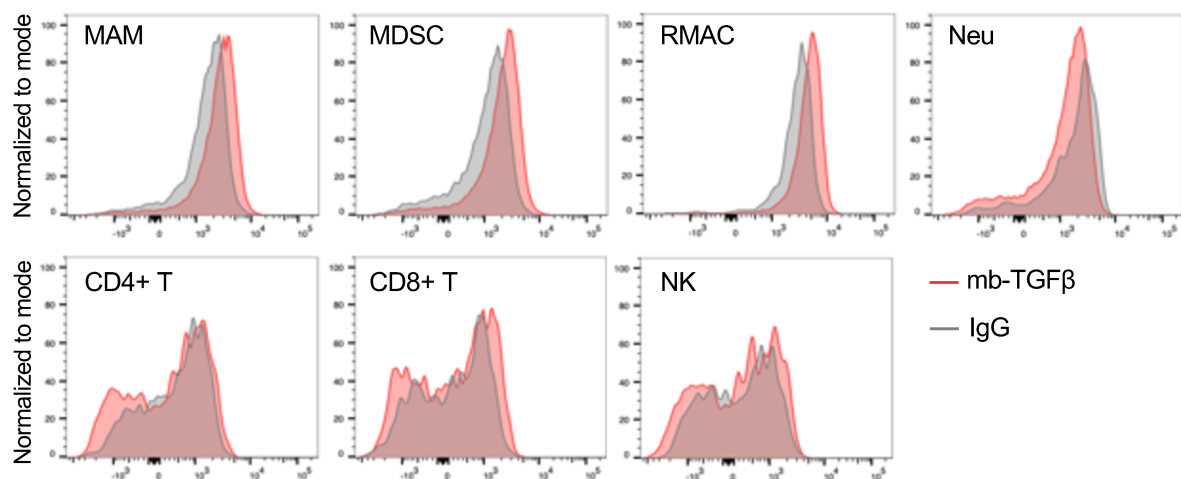

**Supplementary Figure 3. Representative histograms showing the expression of membrane bound TGF $\beta$  on tumor infiltrating immune cells.** Lungs with metastatic tumors were isolated on day 14 after intravenous injection of E0771-LG:Fl#4 cells. Single cell suspensions of the lung were stained with antibodies for immune cell markers and for TGF $\beta$ . Each cell type was gated as shown in Supplementary Figure 1.
