# Supplementary figures and images for: Metastasis-associated macrophages constrain antitumor capability of natural killer cells in the metastatic site at least partially by membrane bound transforming growth factor β
Source: HighWire-hosted journal article supplement (doi:10.1136/jitc-2020-001740), 2021-01-01

## Graphical abstract

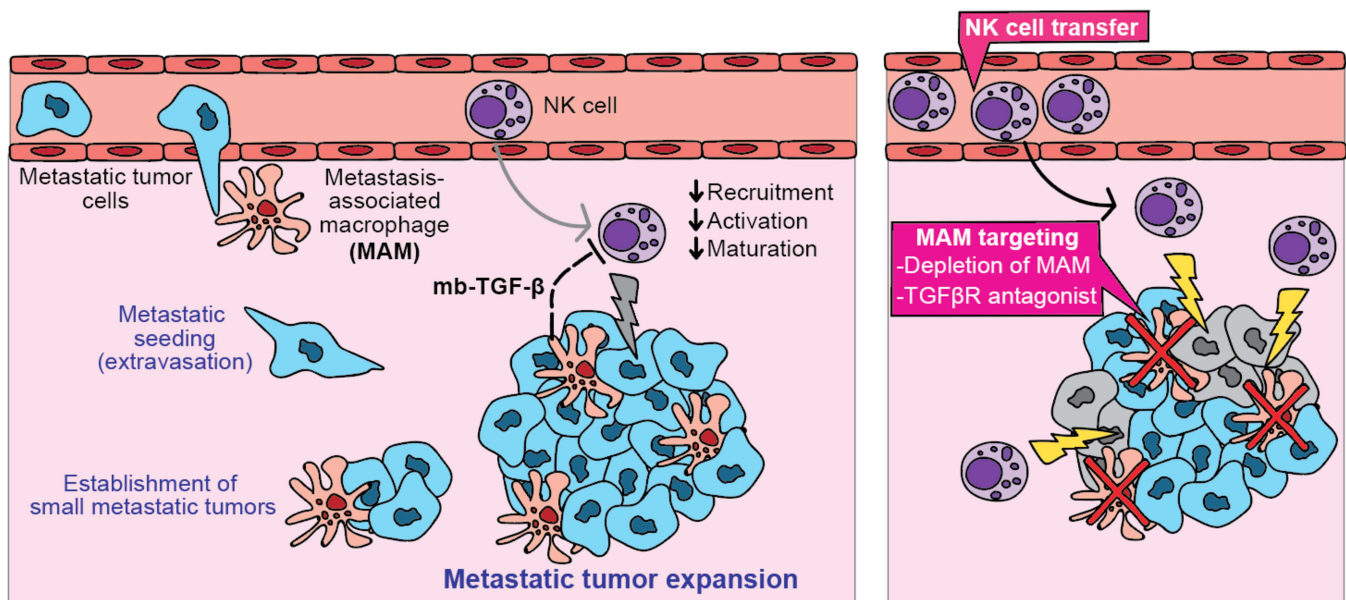

Supplement: jitc-2020-001740supp005_data_supplement.pdf [file jitc-2020-001740supp005_data_supplement.pdf]
